# Supplementary material
Source: Research Square preprint supplement (doi:10.21203/rs.3.rs-9018980/v1)
Supplement: Supplementary file 1 [file e3cdf5c5f9d1e0e508843814.docx]

**Supplementary Information:**

**Digital traces of child maltreatment: Investigating TikTok data donations and predicting depressive symptoms in adolescents**

**Supplementary Table S1.** Calculation of objective Tik Tok use variables gathered from data archives

| **Data Archive Variable** | **Calculation** | **Data Archive Source File** | **Min - Max** |
| --- | --- | --- | --- |
| **Videos Viewed / Week** | Mean number of videos watched per week; total number of videos divided by the number of recorded weeks in browsing history. | Browsing/Watch History.txt | 68.50 - 10940.59 |
| **Videos Skipped / Week** | Skipped was operationalized as two consecutive video view timestamps less than 3 seconds apart. Total number of skipped videos divided by the number of recorded weeks in browsing history. | Browsing/Watch History.txt | 14.83 - 6045.53 |
| **Unique Videos Viewed / Week** | Mean number of unique videos watched per week (each video counted only once, even if viewed multiple times). The total number of unique videos was divided by the number of recorded weeks in browsing history. | Browsing/Watch History.txt | 59.75 - 9844.41 |
| **Multiply-viewed Videos / Week** | Mean number of videos watched repeatedly per week (videos with >1 occurrence in history). Averaged over the number of recorded weeks in browsing history. | Browsing/Watch History.txt | 0.50 - 1065.37 |
| **Sessions / Week** | Mean number of TikTok sessions per week. A session was defined as continuous activity, interrupted by max. 10 minutes. The total number of sessions was divided by the number of recorded weeks in browsing history. | Browsing/Watch History.txt | 1.25 - 109.82 |
| **Session Length (Seconds)** | Average length of sessions (in seconds). Length of sessions diveded by the number of sessions. | Browsing/Watch History.txt | 372.52 - 2892.85 |
| **Follower** | Total number of followers. | Follower.txt | 3 - 4148 |
| **Following** | Total number of accounts followed. | Following.txt | 10 - 9743 |
| **Number Of Videos Liked / Week** | Mean number of videos liked per week. Averaged over the number of recorded weeks in favorite history. | Like List.txt | 5.12 - 2000.00 |
| **Number Of Videos Favorited / Week** | Mean number of videos added to favorites per week. Averaged over the number of recorded weeks in favorite history. | Favorite Videos.txt | 1.00 - 696.70 |
| **Videos Not Found From Favorites / Week** | Number of favorite videos no longer available (“video not found”). Averaged over the number of recorded weeks in favorite history. | Favorite Videos.txt | 0.12 - 373.44 |
| **Proportion Of Videos Viewed At Night** | Percentage of videos viewed between 10:00 PM and 6:00 AM (overnight views divided by total views). | Browsing/Watch History.txt | 0.00 - 0.70 |
| **Shares / Week** | Mean number of videos shared per week. Averaged over the number weeks of activity in shares history. | Share History.txt | 0.01 - 1456.19 |
| **Searches / Week** | Mean number of searches per week. Number of searches divided by the number weeks of activity in searches history. | Searches.txt | 0.57 - 210.05 |
| **Accounts Blocked / Week** | Mean number of blocked users per week. Averaged over the number of weeks of activity in the block list. | Block List.txt | 0.00 - 3.00 |
| **Comments / Week** | Mean number of comments posted per week. Averaged over the number weeks of activity in comment history. | Comments.txt | 0.04 - 92.14 |
| **Direct Messages Sent / Week** | Mean number of messages sent per week. Averaged over the number of weeks of activity in direct messages history. | Direct Messages.txt | 0.36 - 411.77 |
| **Direct Messages Received / Week** | Mean number of received messages per week. Averaged over the number of weeks of activity in direct messages history. | Direct Messages.txt | 0.25 - 394.15 |
| **Chat Partners / Week** | Mean number of chat partners per week. Averaged over the number of weeks of activity in direct messages history. | Direct Messages.txt | 0.17 - 5.15 |
| **Single Contacts / Week** | Mean number of single, very short chat contacts, i.e., less than 3 messages per side, per week. Averaged over the number of weeks of activity in direct messages history. | Direct Messages.txt | 0.00 - 1.29 |
| **Posts / Week** | Number of self-posted videos per week averaged over the number of weeks of activity in posts history. | Posts.txt | 0.00 - 31.87 |
| **Likes Received On Profile** | Total number of likes received on the user’s profile. | Displayed on profile page | 0 - 364067 |
| **Private Account Status** | Binary variable: 0 = public account, 1 = private account enabled | Settings.txt | 0 - 1 |
| **Number Of Weeks Favorites Recorded** | Control variable. Number of weeks for which favorited videos were recorded. | Favorite Videos.txt | 2 - 277 |

**Supplementary Table S2**. Self-report items used to assess TikTok use

| **Variable** | Item description | Min - Max |
| --- | --- | --- |
| **Parental Control** | “To what extent is your smartphone use at home monitored or controlled by parents or others?“ 0 = Not at all, 1 = A little, 2 = Moderate, 3 = Strong, 4 = Very strong | 0 - 3 |
| **Self-report Daily Usage Duration** | “How much time do you usually spend on TikTok per day?” 0 = 15 minutes or less, 1 = Between 15 and 30 minutes, 2 = Between 30 minutes and 1 hour, 3 = Between 1 and 3 hours, 4 = More than 3 hours | 0 - 4 |
| **Participation in TikTok Trends / Challenges** | “How often do you participate in TikTok trends or challenges?” 0 = Never., 1 = Sometimes, 2 = Yes, often | 0 - 1 |
| **Online-only friends** | “Do you have friends on TikTok that you have never met in person?” 0 = No, none, 1 = Yes, a few, 2 = Yes, many | 0 - 2 |
| **Sexual solicitations On TikTok** | “Have you ever received a sexual solicitation via TikTok?” 0 = No, never, 1 = Yes, happened once, 2 = Yes, happened several times | 0 - 2 |
| **Meeting TikTok Strangers Offline** | “Have you ever met someone in real life that you met on TikTok?” 0 = No, 1 = Yes | 0 - 1 |

**Supplementary Table S3**. Variables entered into the final XGBoost model

| **Variable** | **Type** | **Preprocessing Steps** |
| --- | --- | --- |
| Searches/Week | Continuous | Log1p transformation, Winsorization (1%-99%) |
| Age | Continuous | No transformation |
| Socioeconomic Status | Continuous | No transformation |
| Session Length (Seconds) | Continuous | Log1p transformation, Winsorization (1%-99%) |
| Posts/Week | Continuous | Log1p transformation, Winsorization (1%-99%) |
| Parental Control | Binary | Binarized (0 = absence, 1 = presence) |
| Sexual Solicitations On TikTok | Binary | Binarized (0 = absence, 1 = presence) |
| Number Of Weeks Favorites Recorded | Continuous | No transformation |
| Follower Count | Continuous | Log1p transformation, Winsorization (1%-99%) |
| Chat Partners/Week | Continuous | Log1p transformation, Winsorization (1%-99%) |
| Direct Messages Received/Week | Continuous | Log1p transformation, Winsorization (0.5%-99.5%) |
| Meeting TikTok-Strangers Offline | Binary | Binarized (0 = absence, 1 = presence) |
| Single Contacts/Week | Continuous | Log1p transformation, Winsorization (1%-99%) |
| Favorites Index | Composite (PCA) | Standardized (Z-score), PCA (1st component retained; 2 features combined – Avg. Videos Favorited, Avg. Videos Not Found From Favorite |
| Following Count | Continuous | Log1p transformation, Winsorization (1%-99%) |
| Accounts Blocked/Week | Continuous | Log1p transformation, Winsorization (1%-99%) |
| Likes Received on Profile | Continuous | Log1p transformation, Winsorization (0.5%-99.5%) |
| Participation in TikTok Trends/Challenges | Binary | Binarized (0 = absence, 1 = presence) |
| Sessions/Week | Continuous | Log1p transformation, Winsorization (1%-99%) |
| Comments/Week | Continuous | Log1p transformation, Winsorization (1%-99%) |
| Private Account Status | Binary | Binarized (0 = public, 1 = private) |
| Online-Only Friends | Binary | Binarized (0 = absence, 1 = presence) |
| Video Engagement Index | Composite (PCA) | Standardized (Z-score), PCA (1st component retained; 5 features combined – Avg. Videos Viewed per Week, Avg. Unique Videos per Week, Avg. Videos Skipped per Week, Avg. Multiply-Viewed Videos, Avg. Videos Liked per Week) |
| Gender (0=f, 1=m, 2=div) | Categorical | Encoded (0 = female, 1 = male, 2 = diverse) |

**Supplementary Table S4.** Frequencies of child maltreatment subtypes along CTQ severity scores

|  | **Emotional Abuse**  ***n (%)*** | **Physical Abuse**  ***n (%)*** | **Sexual Abuse**  ***n (%)*** | **Emotional Neglect**  ***n (%)*** | **Physical Neglect**  ***n (%)*** |
| --- | --- | --- | --- | --- | --- |
| 1 None to minimal | 75 (58.1) | 111 (86.0) | 101 (78.3) | 70 (54.3) | 93 (72.1) |
| 2 Low to moderate | 27 (20.9) | 9 (7.0) | 11 (8.5) | 40 (31.0) | 19 (14.7) |
| 3 Moderate to severe | 13 (10.1) | 7 (5.4) | 11 (8.5) | 11 (8.5) | 7 (5.4) |
| 4 Severe to extreme | 14 (10.9) | 2 (1.6) | 6 (4.7) | 8 (6.2) | 10 (7.8) |
| At least moderate to severe | 27 (20.9) | 9 (6.98) | 17 (13.2) | 19 (14.7) | 17 (13.2) |

**Notes**. CTQ = Childhood Trauma Questionnaire

**Supplementary Methods**

**Machine learning**

Multiple predictive models were evaluated for child maltreatment status classification on a small dataset (*n* = 129). Due to the limited sample size, Leave-One-Out Cross-Validation (LOOCV) was used for outer evaluation, with a 3-fold inner CV for hyperparameter tuning. LOOCV maximizes training data usage and provides stable performance estimates in small-sample settings, where standard train–test splits or k-fold CV can be unreliable [1]. This validation strategy is commonly used in biomedical and clinical psychology research with constrained sample sizes [2–4]. The full modeling pipeline is described below.

**Data Preprocessing:**

The preprocessing phase (*n* = 129) addressed skewness, missingness, multicollinearity, and encoding via a six-step pipeline:

1. *Categorical encoding:* Gender was encoded as 0 (female), 1 (male), 2 (diverse); three ordinal/count variables (Parental Control, Online-Only Friends, Sexual Solicitations on TikTok) were binarized (0/1) [5,6].
2. *Distributional adjustment:* Continuous variables were transformed based on descriptive statistics and non-normality (Shapiro–Wilk p < 0.05) [7,8]. Severely skewed variables (skewness > 3 or kurtosis > 10; e.g., Avg. Videos Not Found/Week, Avg. Shares/Week, Likes received on profile) underwent log1p transformation and winsorization (0.5–99.5%) [9]. Moderately skewed variables (1 < skewness ≤ 3; e.g., Avg. Videos Viewed /Week, Avg Videos Liked/Week) received log1p transformation with winsorization (1–99%) [10]. Log1p (defined as log1p(x) = ln(1 + x), where ln is the natural logarithm) is a variance-stabilizing and skewness-reducing transformation that is commonly used for non-negative data with extreme values or sparsity and safely handles zeros (log1p(0) = ln(1 + 0) = 0).
3. *Missingness:* Variables with <5% missingness were imputed via kNN (k = 5).
4. *Dimensionality reduction:* To mitigate multicollinearity, two PCA-derived indices were constructed following Z-score scaling: a Video Engagement Index (5 features) and a Favorites Index (2 features), retaining PC1 only [12].
5. *Standardization:* All remaining non-categorical, non-binary variables were Z-standardized. Collinearity and leakage control: Perfectly collinear proportion pairs were removed (sum = 1). Post-transformation VIF analysis identified three features with VIF > 5 (SES_SUM, Avg direct messages received/sent); Avg direct messages sent was excluded, while SES_SUM and Avg direct messages received were retained due to theoretical relevance and statistical significance [13,14].
6. *Validation:* Pre/post transformation diagnostics confirmed improved normality, and Pearson correlations indicated no residual multicollinearity (|r| < 0.8).

**Model Selection and Hyperparameter Optimization:**

Seven models were evaluated: generalized additive models (EBM) [15,16], gradient boosting (XGBoost) [17], bagging-based ensembles (Random Forest [18], Extra Trees [19]), linear models (logistic regression) [20], kernel methods (SVC) [21], and unbiased tree learners (conditional inference trees) [22].

**Evaluation Framework**

Performance was assessed via nested cross-validation with a LOOCV outer loop and 3-fold inner CV for hyperparameter tuning [13,24]. The mean macro F1 score was used to mitigate majority-class dominance and emphasize minority-class performance [25,26].

**Class Imbalance Handling**

Minority-class imbalance was addressed using a Wasserstein GAN (WGAN) [27,28], trained per fold on minority samples (latent dimension = 8, batch size = 8, learning rate = 5e−4) [29]. For each training fold, synthetic samples equal to the minority-class count were generated and added to the training set.

**Hyperparameter Optimization**

Tuning employed Optuna’s TPE-based Bayesian optimization [36–38] with a Successive Halving pruner for early termination of underperforming trials [39].

1. **Search Spaces:**

**Table 1.** Hyperparameter Search Space (Initial Screening)

| **Model** | **Hyperparameter** | **Type** | **Range/Options** |
| --- | --- | --- | --- |
| **LogisticRegression** | C | float (log) | 1e-4 to 100.0 |
|  | class_weight | categorical | [None, 'balanced'] |
| **RandomForest** | n_estimators | int | 50 to 500 |
|  | max_depth | int | 2 to 20 |
|  | min_samples_leaf | int | 1 to 10 |
|  | class_weight | categorical | [None, 'balanced'] |
| **XGBoost** | learning_rate | float (log) | 1e-3 to 0.5 |
|  | n_estimators | int | 50 to 500 |
|  | max_depth | int | 2 to 10 |
|  | subsample | float | 0.5 to 1.0 |
|  | colsample_bytree | float | 0.5 to 1.0 |
|  | reg_lambda | float (log) | 1e-3 to 10.0 |
| **SVC** | C | float (log) | 1e-4 to 100.0 |
|  | gamma | categorical | ['scale', 'auto'] |
|  | class_weight | categorical | [None, 'balanced'] |
| **ExtraTrees** | n_estimators | int | 50 to 500 |
|  | max_features | categorical | ['sqrt', 'log2'] |
|  | min_samples_split | int | 2 to 10 |
| **Conditional InferenceTree** | max_depth | int | 1 to 20 |
|  | min_samples_leaf | int | 1 to 10 |
| **EBM** | learning_rate | float (log) | 1e-3 to 0.5 |
|  | n_estimators | int | 10 to 500 |
|  | max_bins | int | 32 to 255 |

1. **Optimization Process:** Inner 3-Fold CV: For each outer LOOCV fold, hyperparameters were optimized using 20 Optuna trials per model, with the best configuration selected based on the mean macro F1 score. Model performance from initial screening are shown in Table 2.

**Table 2.** Model Performance (Initial Screening; LOOCV)

| **Model** | **Mean Macro F1** | **95% CI** | **n_folds** |
| --- | --- | --- | --- |
| EBM | 0.689922 | (0.612403, 0.775194) | 129 |
| XGBoost | 0.682171 | (0.604651, 0.759690) | 129 |
| RandomForest | 0.658915 | (0.573643, 0.736434) | 129 |
| ExtraTrees | 0.651163 | (0.558140, 0.728682) | 129 |
| LogisticRegression | 0.635659 | (0.550388, 0.720930) | 129 |
| SVC | 0.620155 | (0.534884, 0.705426) | 129 |
| ConditionalInferenceTree | 0.565891 | (0.480620, 0.658915) | 129 |

- Refinement: Initial screening showed EBM achieved the highest mean macro F1 (0.690, 95% CI [0.612, 0.775]), while XGBoost yielded the best single trial (macro F1 ≈ 0.82) despite a slightly lower mean (0.682, 95% CI [0.605, 0.759]), indicating greater overall upside. XGBoost was therefore selected for refinement; the narrowed hyperparameter space is reported in Table 3.

**Table 3.** Refined Hyperparameter Search Space (XGBoost Only)

| **Hyperparameter** | **Type** | **Range/Options (Refined)** | **Previous Range/Options** | **Description** |
| --- | --- | --- | --- | --- |
| learning_rate | float (log) | 0.0005 to 0.01 | 1e-3 to 0.5 | Boosting step size; smaller values trade faster convergence for improved generalization. |
| n_estimators | int | 200 to 600 | 50 to 500 | Number of boosting iterations; higher values increase ensemble capacity. |
| max_depth | int | 3 to 6 | 2 to 10 | Tree depth controlling model complexity and overfitting. |
| subsample | float | 0.7 to 0.9 | 0.5 to 1.0 | Row subsampling rate per tree to inject stochasticity and reduce variance. |
| colsample_bytree | float | 0.5 to 0.8 | 0.5 to 1.0 | Feature subsampling rate per tree to decorrelate trees. |
| reg_lambda | float (log) | 0.001 to 1.0 | 1e-3 to 10.0 | L2 regularization strength on leaf weights to control overfitting. |

**Final Parameters and Model Performance**

Optuna identified the following XGBoost configuration: learning rate = 0.0094; n_estimators = 389 (near the upper bound of 200–600); max_depth = 4; subsample = 0.704 (lower bound of 0.7–0.9); colsample_bytree = 0.682 (lower range of 0.5–0.8); reg_lambda = 0.118 (mid-range of 0.001–1.0). Under this configuration, XGBoost achieved a mean macro F1 of 0.713 (95% CI [0.636, 0.791]) across 129 LOOCV folds.

**Interpretability**

Model interpretability was assessed using SHAP values [40,41], visualized via beeswarm contribution and mean absolute contribution bar plots.

**References**

1. Stone, M. (1974). Cross-validatory choice and assessment of statistical predictions. Journal of the Royal Statistical Society: Series B (Methodological), 36(2), 111–133 <https://sites.stat.washington.edu/courses/stat527/s13/readings/Stone1974.pdf>
2. Gao, S., Calhoun, V. D., & Sui, J. (2018). Machine learning in major depression: From classification to treatment outcome prediction. CNS Neuroscience & Therapeutics, 24(11), 1037–1052. <https://doi.org/10.1111/cns.13048>
3. Chen, Y., Zhao, W., Yi, S., & Liu, J. (2023). The diagnostic performance of machine learning based on resting-state functional magnetic resonance imaging data for major depressive disorders: a systematic review and meta-analysis. Frontiers in Neuroscience, 17, 1174080. <https://doi.org/10.3389/fnins.2023.1174080>
4. Orrù, G., Monaro, M., Conversano, C., Gemignani, A., & Sartori, G. (2020). Machine learning in psychometrics and psychological research. Frontiers in Psychology, 10, 2970. <https://doi.org/10.3389/fpsyg.2019.02970>
5. Conde, A., Leandro, S., Maranhão, P., & Domínguez, J. (2022). Binomial transformation applied to presence-absence community data. Ecological Informatics, 70, 101753. <https://doi.org/10.1016/j.ecoinf.2022.101753>
6. Manel, S., Williams, H. C., & Ormerod, S. (2001). Evaluating presence–absence models in ecology: the need to account for prevalence. Journal of Applied Ecology, 38(5), 921–931. <https://doi.org/10.1046/j.1365-2664.2001.00647.x>
7. Shapiro, S. S., & Wilk, M. B. (1965). An analysis of variance test for normality (complete samples). Biometrika, 52(3–4), 591–611. <https://doi.org/10.1093/biomet/52.3-4.591>
8. Thode, H. C. (2002). Testing for normality. <https://doi.org/10.1201/9780203910894>
9. Tukey, J. W. (1962). The future of data analysis. The Annals of Mathematical Statistics, 33(1), 1–67. <https://doi.org/10.1214/aoms/1177704711>
10. Anscombe, F. J. (1948). THE TRANSFORMATION OF POISSON, BINOMIAL AND NEGATIVE-BINOMIAL DATA. Biometrika, 35(3–4), 246–254. <https://doi.org/10.1093/biomet/35.3-4.246>
11. Faisal, S., & Tutz, G. (2021). Imputation methods for high-dimensional mixed-type datasets by nearest neighbors. Computers in Biology and Medicine, 135, 104577. <https://doi.org/10.1016/j.compbiomed.2021.104577>
12. Jolliffe, I. T., & Cadima, J. (2016). Principal component analysis: a review and recent developments. Philosophical Transactions of the Royal Society a Mathematical Physical and Engineering Sciences, 374(2065), 20150202. <https://doi.org/10.1098/rsta.2015.0202>
13. Cawley, G. C., & Talbot, N. L. C. (2010). On over-fitting in model selection and subsequent selection bias in performance evaluation. Journal of Machine Learning Research, 11(70), 2079-2107. [http://jmlr.csail.mit.edu/papers/v11/cawley10a.html#](http://jmlr.csail.mit.edu/papers/v11/cawley10a.html)
14. O’brien, R. M. (2007). A caution regarding rules of thumb for variance inflation factors. Quality & Quantity, 41(5), 673–690. <https://doi.org/10.1007/s11135-006-9018-6>
15. Kruschel, S., Hambauer, N., Weinzierl, S., Zilker, S., Kraus, M., & Zschech, P. (2025). Challenging the Performance-Interpretability Trade-Off: An evaluation of Interpretable machine learning models. Business & Information Systems Engineering. <https://doi.org/10.1007/s12599-024-00922-2>
16. Schug, D., Kovach, T. J., Wolfe, M. A., Benson, J., Park, S., Dodson, J. P., Corrigan, J., Eriksson, M. A., & Zwolak, J. P. (2024b). Figure data files for paper “Automation of quantum dot measurement analysis via explainable machine learning.” arXiv (Cornell University). <https://doi.org/10.5281/zenodo.14589567>
17. Chen, T., & Guestrin, C. (2016). XGBoost. KDD ’16: Proceedings of the 22nd ACM SIGKDD International Conference on Knowledge Discovery and Data Mining, 785–794. <https://doi.org/10.1145/2939672.2939785>
18. Breiman, L. (2001). Random forests. Machine Learning, 45(1), 5–32. <https://doi.org/10.1023/a:1010933404324>
19. Geurts, P., Ernst, D., & Wehenkel, L. (2006). Extremely randomized trees. Machine Learning, 63(1), 3–42. <https://doi.org/10.1007/s10994-006-6226-1>
20. Cox, D. R. (1958). The regression analysis of binary sequences. Journal of the Royal Statistical Society Series B (Statistical Methodology), 20(2), 215–232. <https://doi.org/10.1111/j.2517-6161.1958.tb00292.x>
21. Schölkopf, B., & Smola, A. J. (2001). Learning with Kernels. In The MIT Press eBooks. <https://doi.org/10.7551/mitpress/4175.001.0001>
22. Hothorn, T., Hornik, K., & Zeileis, A. (2006). Unbiased Recursive Partitioning: a Conditional inference framework. Journal of Computational and Graphical Statistics, 15(3), 651–674. <https://doi.org/10.1198/106186006x133933>
23. Hastie, T., Tibshirani, R., & Friedman, J. (2009). The elements of statistical learning. In Springer series in statistics. <https://doi.org/10.1007/978-0-387-84858-7>
24. Steorts, R. C. (2017). Cross-validation [PowerPoint slides]. STA 325, Chapter 5 ISL, Duke University. <https://www2.stat.duke.edu/~rcs46/lectures_2017/05-resample/05-cv.pdf>
25. Sokolova, M., & Lapalme, G. (2009). A systematic analysis of performance measures for classification tasks. Information Processing & Management, 45(4), 427–437. <https://doi.org/10.1016/j.ipm.2009.03.002>
26. Jeni, L. A., Cohn, J. F., & De La Torre, F. (2013). Facing Imbalanced Data--Recommendations for the use of Performance Metrics. 2013 Humaine Association Conference on Affective Computing and Intelligent Interaction, 2013, 245–251. <https://doi.org/10.1109/acii.2013.47>
27. Martin Arjovsky, Soumith Chintala, and Léon Bottou. 2017. Wasserstein generative adversarial networks. In Proceedings of the 34th International Conference on Machine Learning - Volume 70 (ICML'17). JMLR.org, 214–223. <https://dl.acm.org/doi/10.5555/3305381.3305404>
28. Ishaan Gulrajani, Faruk Ahmed, Martin Arjovsky, Vincent Dumoulin, and Aaron Courville. 2017. Improved training of wasserstein GANs. In Proceedings of the 31st International Conference on Neural Information Processing Systems (NIPS'17). Curran Associates Inc., Red Hook, NY, USA, 5769–5779. <https://dl.acm.org/doi/10.5555/3295222.3295327>
29. Karras, T., Aittala, M., Hellsten, J., Laine, S., Lehtinen, J., & Aila, T. (2020). Training Generative Adversarial Networks with Limited Data. arXiv (Cornell University). <https://doi.org/10.48550/arxiv.2006.06676>
30. Chereddy, N. V., & Bolla, B. K. (2023). Evaluating the utility of GAN generated synthetic tabular data for class balancing and low resource settings. In Lecture notes in computer science (pp. 48–59). <https://doi.org/10.1007/978-3-031-36402-0_4>
31. Sauber-Cole, R., & Khoshgoftaar, T. M. (2022c). The use of generative adversarial networks to alleviate class imbalance in tabular data: a survey. Journal of Big Data, 9(1). <https://doi.org/10.1186/s40537-022-00648-6>
32. Chereddy, N., & Bolla, B. K. (2023). Evaluating the utility of GAN generated synthetic tabular data for class balancing and low resource settings. arXiv (Cornell University). <https://doi.org/10.48550/arxiv.2306.13929>
33. Liu, B., Zhu, Y., Song, K., & Elgammal, A. (n.d.). Towards faster and stabilized GAN training for high-fidelity few-shot image synthesis. OpenReview. <https://openreview.net/forum?id=1Fqg133qRaI>
34. Lall, S., Ray, S., & Bandyopadhyay, S. (2022). LSH-GAN enables in-silico generation of cells for small sample high dimensional scRNA-seq data. Communications Biology, 5(1), 577. <https://doi.org/10.1038/s42003-022-03473-y>
35. Thach, N., Habecker, P., Johnston, B., Cervantes, L., Eisenbraun, A., Mason, A., Tyler, K., Khan, B., & Chan, H. (2024). A novel GAN approach to Augment Limited Tabular Data for Short-Term Substance Use Prediction. arXiv (Cornell University). <https://doi.org/10.48550/arxiv.2407.13047>
36. James Bergstra, Rémi Bardenet, Yoshua Bengio, and Balázs Kégl. 2011. Algorithms for hyper-parameter optimization. In Proceedings of the 25th International Conference on Neural Information Processing Systems (NIPS'11). Curran Associates Inc., Red Hook, NY, USA, 2546–2554. <https://dl.acm.org/doi/10.5555/2986459.2986743>
37. Akiba, T., Sano, S., Yanase, T., Ohta, T., & Koyama, M. (2019). Optuna. KDD ’19: Proceedings of the 25th ACM SIGKDD International Conference on Knowledge Discovery & Data Mining, 2623–2631. <https://doi.org/10.1145/3292500.3330701>
38. Wu J., Chen X., Zhang H., Xiong L., Hang L., Si-Hao D. (2019). Hyperparameter Optimization for Machine Learning Models Based on Bayesian Optimization, Journal of Electronic Science and Technology, Volume 17, Issue 1, Pages 26-40, <https://www.sciencedirect.com/science/article/pii/S1674862X19300047>
39. Li, L., Jamieson, K., Rostamizadeh, A., Gonina, E., Hardt, M., Recht, B., & Talwalkar, A. (2018). A system for massively parallel hyperparameter tuning. arXiv (Cornell University). <https://doi.org/10.48550/arxiv.1810.05934>
40. Lundberg, S., & Lee, S. (2017). A unified approach to interpreting model predictions. arXiv (Cornell University). <https://doi.org/10.48550/arxiv.1705.07874>
41. Lundberg, S. M., Erion, G., Chen, H., DeGrave, A., Prutkin, J. M., Nair, B., Katz, R., Himmelfarb, J., Bansal, N., & Lee, S. (2020). From local explanations to global understanding with explainable AI for trees. Nature Machine Intelligence, 2(1), 56–67. <https://doi.org/10.1038/s42256-019-0138-9>
